# Supplementary material for: A new two-dimensional donor/acceptor copolymer based on 4,8-bis(2′-ethylhexylthiophene)thieno[2,3-f]benzofuran for high-performance polymer solar cells
Source: Royal Society of Chemistry journal article supplement (doi:10.1039/c4tc00738g), 2014-01-01
Supplement: c4tc00738g1.pdf [file c4tc00738g1.pdf]

## **A new two-dimensional D-A copolymer based on 4, 8-bis(2'-ethylhexylthiophene)thieno[2,3-f]benzofuran for high performance polymer solar cells**

Ling Fan<sup>‡a</sup>, Ruili Cui<sup>‡ a,b</sup>, Xiuping Guo<sup>‡a</sup>, Dong Qian<sup>a</sup>, Beibei Qiu<sup>a</sup>, Jun Yuan<sup>a</sup>, Yongfang Li<sup>b</sup>, Wenlong Huang<sup>c</sup>, Junliang Yang<sup>c</sup>, Weifang Liu<sup>a</sup>, Xinjun Xu<sup>d</sup>, Lidong Li<sup>d</sup>, Yingping Zou<sup>a,b,e\*</sup>

*a. College of Chemistry and Chemical Engineering, Central South University, Changsha 410083, China. E-mail: yingpingzou@csu.edu.cn(Y.Zou)*

*b. Institute of Super-microstructure and Ultrafast Process in Advanced Materials, School of Physics and Electronics, Central South University, Changsha, Hunan 410083, China.*

*c. Beijing National Laboratory for Molecular Sciences, Institute of Chemistry, Chinese Academy of Sciences, Beijing 100190, China.*

*d. School of Materials Science and Engineering, University of Science and Technology Beijing, Beijing 100083, China*

*e. State key Laboratory for Powder Metallurgy, Central South University, Changsha 410083, China.*

<sup>‡</sup> L.Fan, R.Cui and X.Guo contributed this work equally.

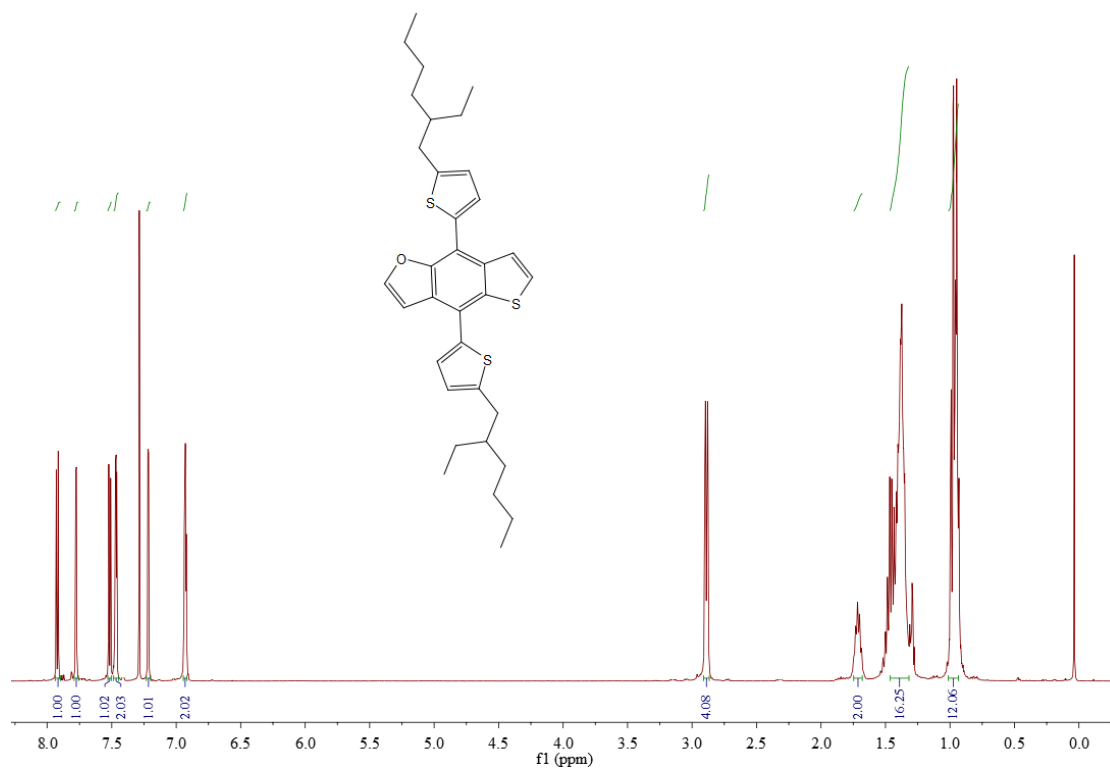

Figure S1 <sup>1</sup>H NMR of compound 4

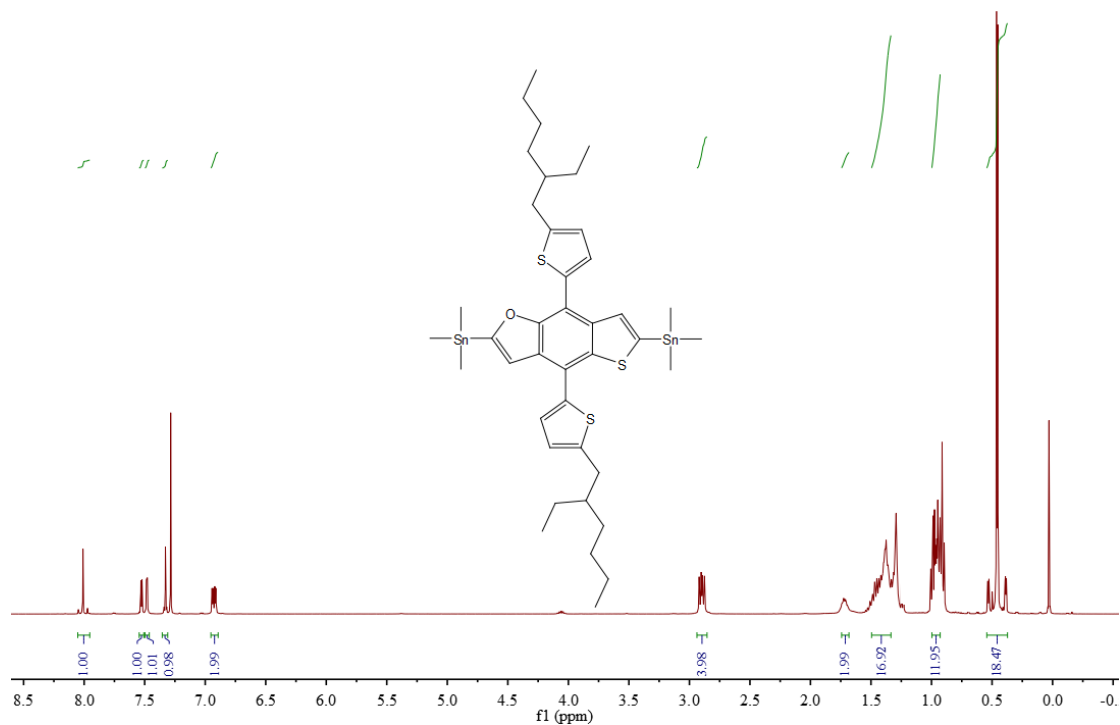

Figure S2 <sup>1</sup>H NMR of monomer M1

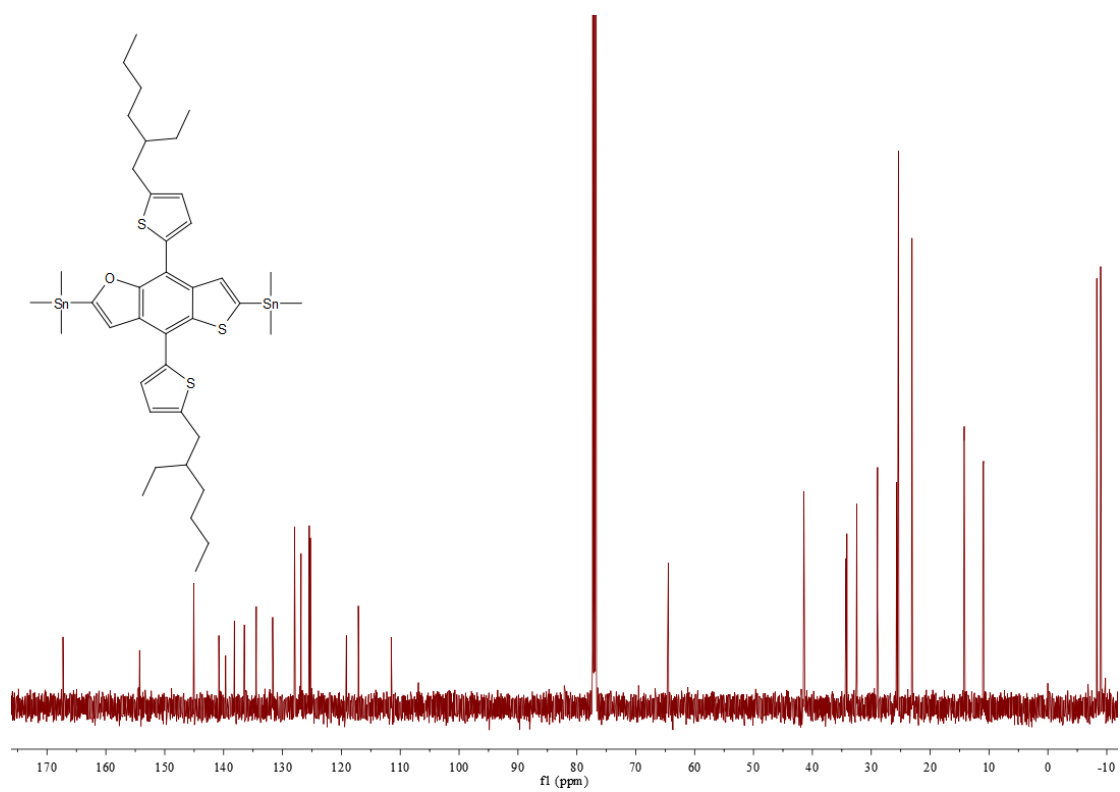

Figure S3  $^{13}\text{C}$  NMR of monomer M1

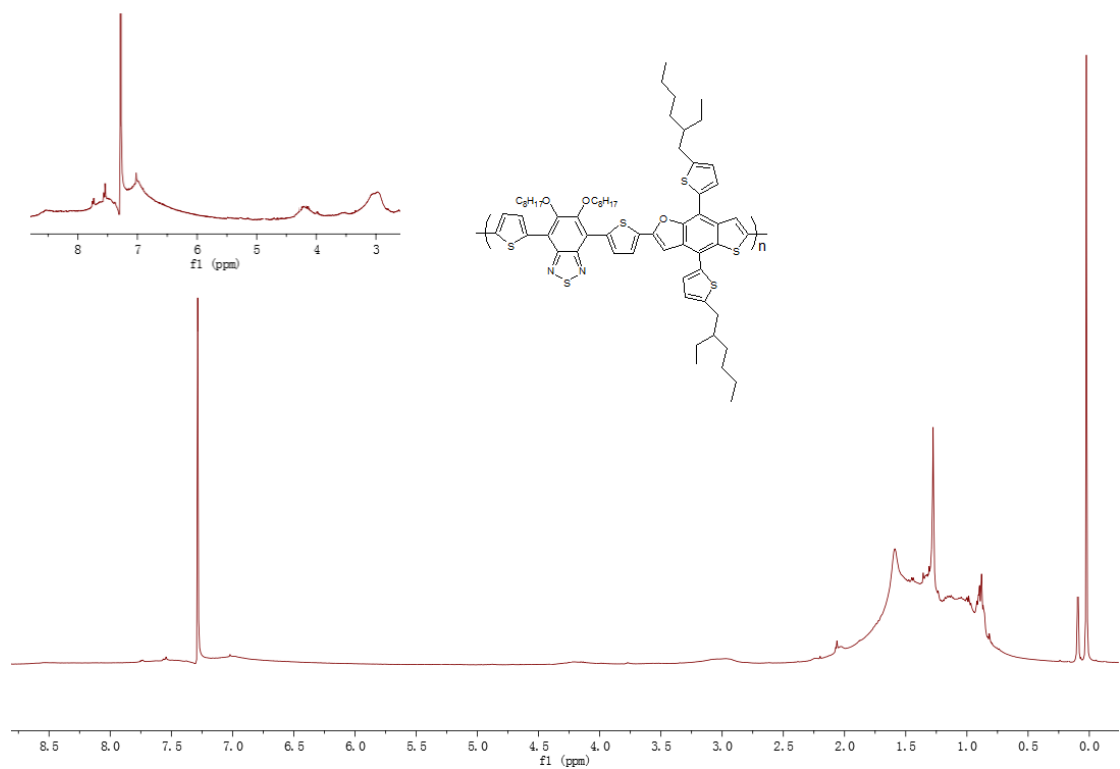

Figure S4  $^1\text{H}$  NMR of PTBFTDTBT

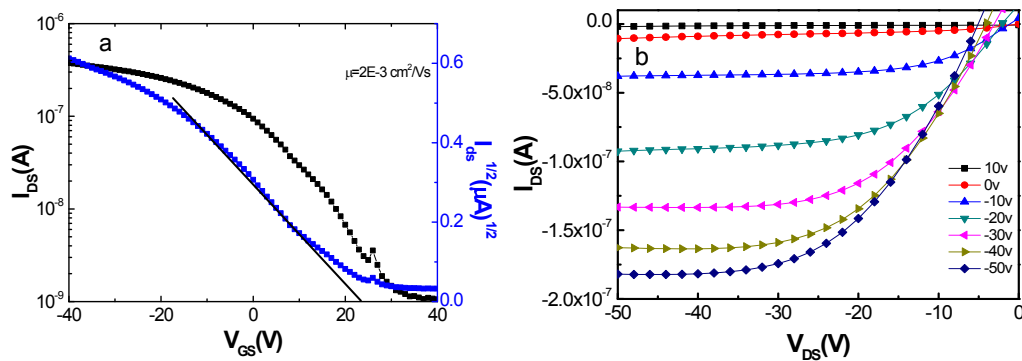

Figure S5 (a) Transfer characteristics of the PTBFTDTBT OFET measured at  $V_{ds} = -50$  V. (b) Output characteristics with  $V_{DS}$  varying from 10 V to -50 V in steps of 10 V deposited on OTS modified  $\text{SiO}_2$ .

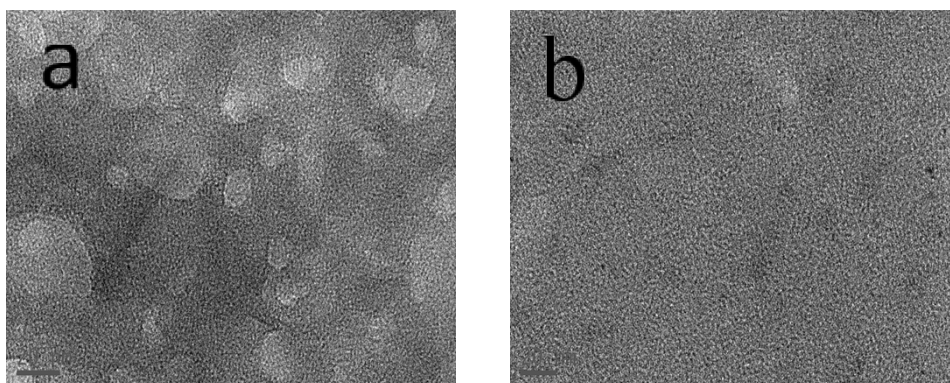

Figure S6 TEM images of PTBFTDTBT/ $\text{PC}_{71}\text{BM}$  blend films prepared by ODCB. (a) 1:1 D/A ratio; (b) 1:2 D/A ratio. Scale bar: 20 nm.
